# Supplementary material for: Seroma after Simple Mastectomy in Breast Cancer—The Role of CD4+ T Helper Cells and the Evidence as a Possible Specific Immune Process
Source: MDPI journal article supplement (doi:10.3390/ijms23094848), 2022-04-27
Supplement: s1 [file s1]

| Characteristics    | Study population | Healthy controls |
|--------------------|------------------|------------------|
| Number (n)         | 16               | 15               |
| Age median (range) | 73 (48-85)       | 38 (20-54)       |
| Menopausal status  |                  |                  |
| premenopausal      | 1                | 13               |
| postmenopausal     | 15               | 2                |

**Suppl. Table S1:** Personal characteristics of the study cohort.

| Patient number | Chemotherapy neoadjuvant [yes/no] | Type of axilla surgery | Radiation adjuvant before seroma development [yes/no] |
|----------------|-----------------------------------|------------------------|-------------------------------------------------------|
| 1              | yes                               | axilla dissection      | no                                                    |
| 2              | no                                | SLNE                   | no                                                    |
| 3 left/right   | yes                               | SLNE left/right        | no                                                    |
| 4              | no                                | SLNE                   | no                                                    |
| 5              | no                                | no surgery             | no                                                    |
| 6              | no                                | SLNE                   | no                                                    |
| 7              | no                                | SLNE                   | no                                                    |
| 8 left/right   | no                                | SLNE left/right        | no                                                    |
| 9              | yes                               | axilla dissection      | no                                                    |
| 10             | yes                               | axilla dissection      | no                                                    |
| 11             | no                                | axilla dissection      | no                                                    |
| 12             | yes                               | SLNE                   | no                                                    |
| 13             | no                                | SLNE                   | no                                                    |
| 14             | yes                               | axilla dissection      | no                                                    |
| 15             | yes                               | SLNE                   | no                                                    |
| 16             | no                                | axilla dissection      | no                                                    |

**Suppl. Table S2:** Description of Therapy approaches of patients enrolled in the study.

| Patient number | Seroma fine needle aspiration [x-times] | 1 <sup>st</sup> Aspiration at visit [visit number] | 2 <sup>nd</sup> Aspiration [days after 1 <sup>st</sup> aspiration] | Volume of aspirates [ml]                    |
|----------------|-----------------------------------------|----------------------------------------------------|--------------------------------------------------------------------|---------------------------------------------|
| 1              | 1x                                      | 3                                                  | -                                                                  | 75                                          |
| 2              | 1x                                      | 2                                                  | -                                                                  | 200                                         |
| 3 left/ right  | 1x/1x                                   | 2                                                  | -                                                                  | 185/125                                     |
| 4              | 15x                                     | 2                                                  | 5                                                                  | 104±52 (20-235)                             |
| 5              | 2x                                      | 2                                                  | 17                                                                 | 1 <sup>st</sup> : 20, 2 <sup>nd</sup> :105  |
| 6              | 1x                                      | 4                                                  | -                                                                  | 75                                          |
| 7              | 1x                                      | 4                                                  | -                                                                  | 100                                         |
| 8 left/right   | 1x                                      | 2                                                  | -                                                                  | left: 80, right:160                         |
| 9              | 3x                                      | 2                                                  | 14                                                                 | 182±146 (85-350)                            |
| 10             | 2x                                      | 2                                                  | 7                                                                  | 1 <sup>st</sup> : 225, 2 <sup>nd</sup> : 80 |
| 11             | 1x                                      | 2                                                  | -                                                                  | 540                                         |
| 12             | 2x                                      | 2                                                  | 7                                                                  | 1 <sup>st</sup> : 75, 2 <sup>nd</sup> : 50  |
| 13             | 1x                                      | 3                                                  | -                                                                  | 40                                          |
| 14             | 1x                                      | 2                                                  | -                                                                  | 190                                         |
| 15             | 1x                                      | 2                                                  | -                                                                  | 150                                         |
| 16             | 1x                                      | 3                                                  | -                                                                  | 23                                          |

**Suppl. Table S3:** Seroma aspirations per patient and visit. Visit numbers: visit 2: 2-3 weeks after surgery, visit 3: 4-6 weeks after surgery, visit 4: 6-12 weeks after surgery, volume of each individual aspiration is shown in ml, for aspiration number >2 the volume is shown as mean ± standard deviation and the minimum as well as maximum volume. Mean aspirate volume: 141.8 ml, Median: 112 ml, SD: 120.6 ml. Chemotherapy preoperative + Seroma postoperative: n=7; out of four got axilla dissection and three SLNE. Chemotherapy preoperative + Seroma ≥100 ml: n=5 out of seven. Chemotherapy preoperative + Seroma ≥100 ml + axilla dissection: n=3 (out of 4) Chemotherapy preoperative + Seroma ≥100 ml + SLNE: n=3 (out of 3) No chemotherapy + Seroma postoperative: n=9; out of six got SLNE, two an axilla dissection and one no axilla surgery. No chemotherapy + Seroma ≥100 ml: n=6 out of nine. No chemotherapy + Seroma ≥100 ml + axilla dissection: n=1 (out of 1) No chemotherapy + Seroma ≥100 ml + SLNE: n=4 (out of 6) No chemotherapy + Seroma ≥100 ml + no axilla surgery: n=1 (out of 1), Seroma + axilla dissection: n=6, Seroma + SLNE: n=9, Seroma + no axilla surgery: n=1, Seroma ≥100 ml: n=11, Seroma ≥100 ml + axilla dissection: n=4 (out of 6), Seroma ≥100 ml + SLNE: n=6 (out of 9), Seroma ≥100 ml + no axilla surgery: n=1,

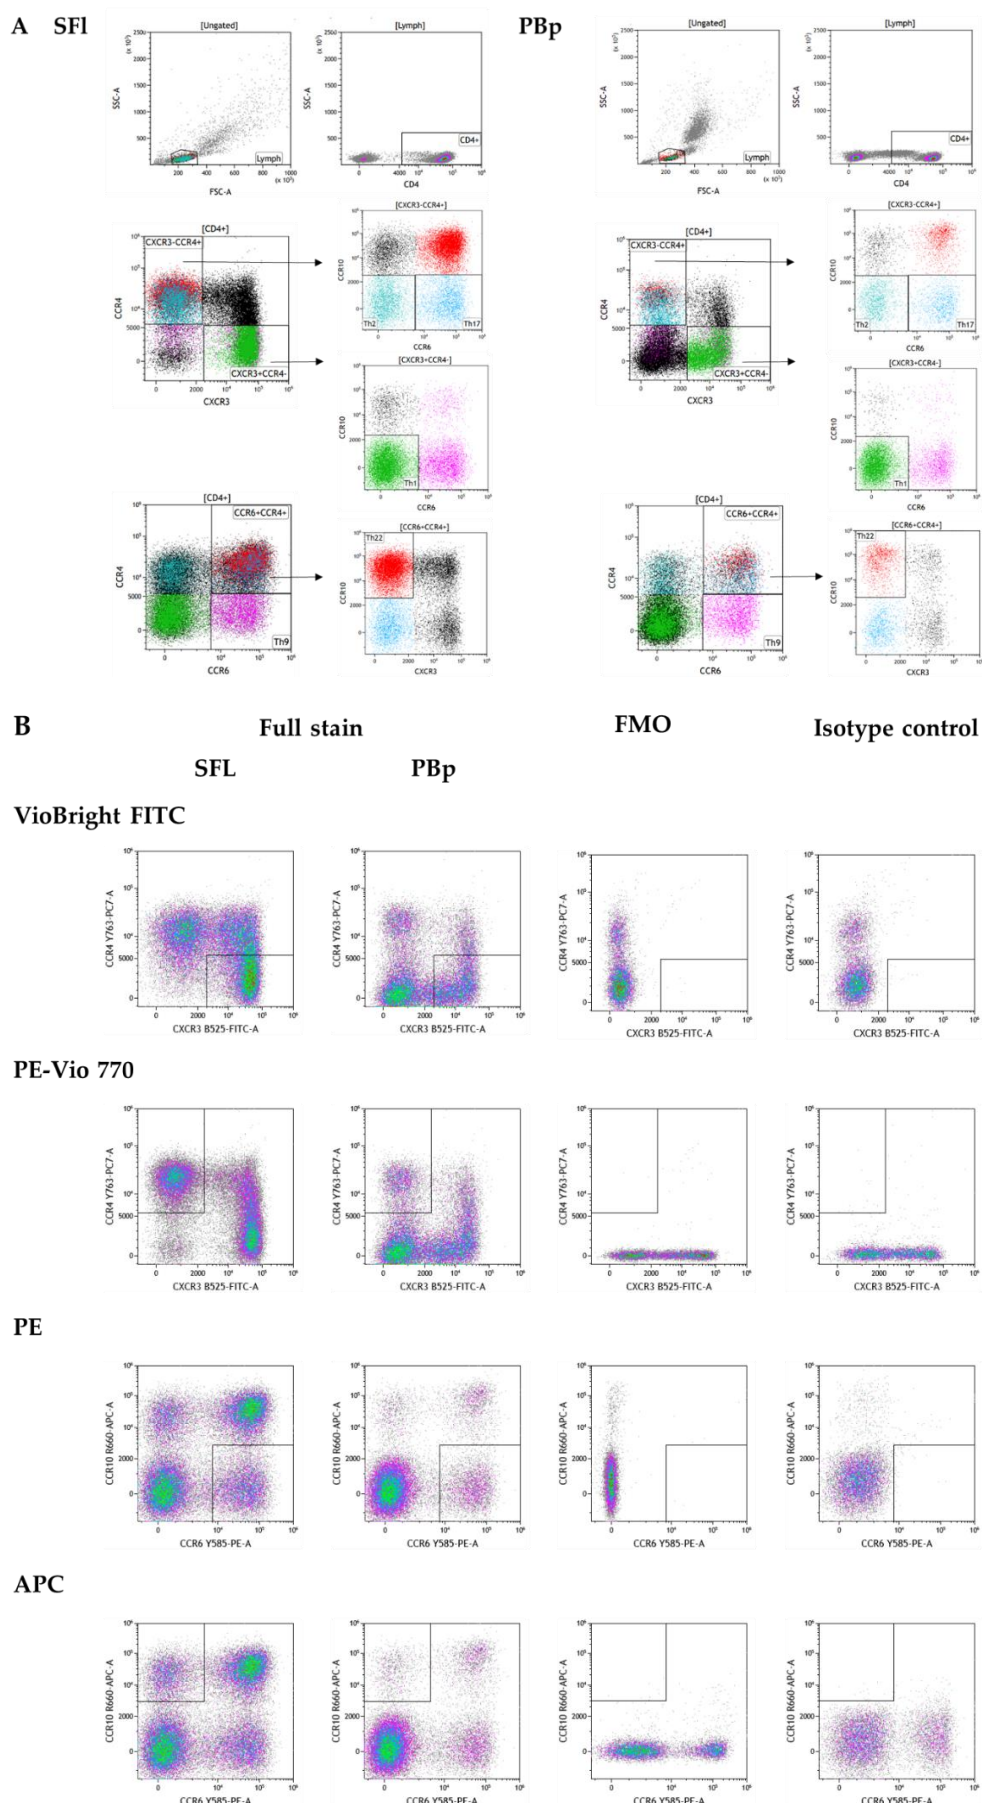

**Suppl. Figure S1:** Example of flow cytometry analysis of SFI and PBp stained with panel 2. **A)** Gating strategy of panel 2 **B)** FMO and Isotype controls for panel 2.

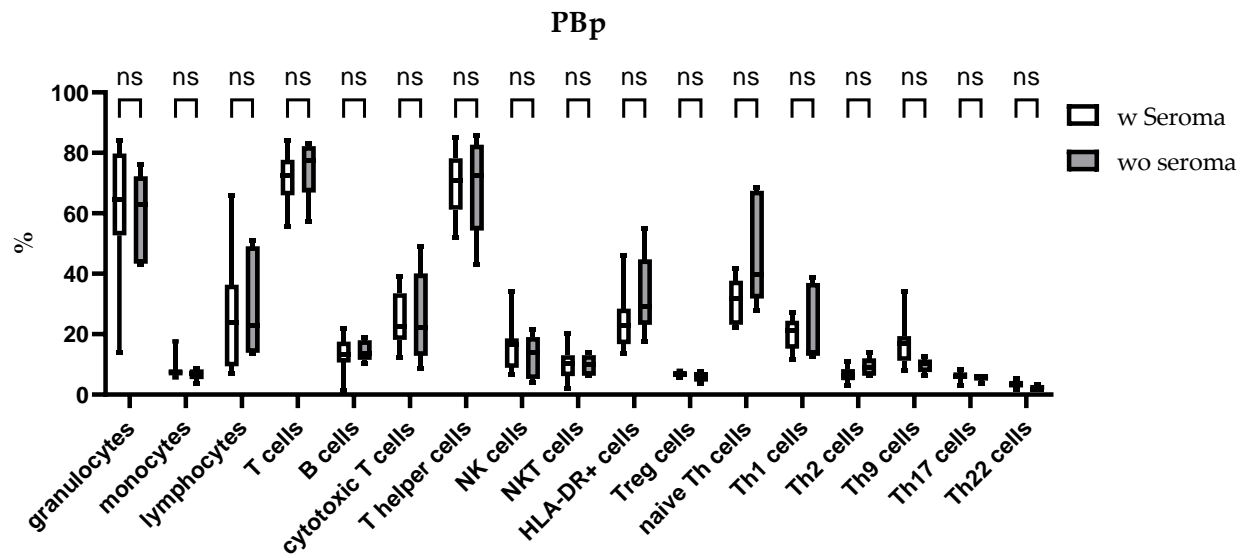

**Suppl. Figure S2:** Comparison between PBp with (n=12) and without (n=5) seroma formation.
